# Supplementary material for: Constraining the particle-scale diversity of black carbon light absorption using a unified framework
Source: Copernicus journal article supplement (doi:10.5194/acp-22-14825-2022), 2022-11-22
Supplement: Supplementary file 1 [file acp-22-14825-2022-supplement.pdf]

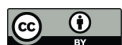

*Supplement of*

## **Constraining the particle-scale diversity of black carbon light absorption using a unified framework**

**Payton Beeler and Rajan K. Chakrabarty**

*Correspondence to:* Rajan K. Chakrabarty (chakrabarty@wustl.edu) and Payton Beeler (beelerpayton@wustl.edu)

The copyright of individual parts of the supplement might differ from the article licence.

## Data from field and laboratory experiments

*Cappa, et al. 2012.*

- 5 The mixing state of internally mixed BC aggregates measured by Cappa *et al.* 2012 (1) was found by first fitting a power-law function to mean  $R_{BC}$  as function of photochemical age ( $-\log([\text{NO}_x]/[\text{NO}_y])$ ), which is shown in figure 1(a). The fitted equation is given by:

$$R_{BC} = (12.215 \pm 0.396) \left( -\log \left( \frac{[\text{NO}_x]}{[\text{NO}_y]} \right) \right)^{0.554 \pm 0.067} \quad (S1)$$

- 10 Mass absorption cross-section of BC ( $\text{MAC}_{BC}$ ) at wavelength ( $\lambda$ ) of 532 nm is then calculated from figure S-17 of Cappa *et al.* 2012, which shows  $\text{MAC}_{BC}$  enhancement ( $E_{\text{abs}}$ ) as a function of photochemical age. Photochemical age was converted to  $R_{BC}$  using equation S1, and  $E_{\text{abs}}$  was converted to  $\text{MAC}_{BC}$  using the reported value for  $\text{MAC}_{BC}$  of pure BC ( $7.75 \text{ m}^2/\text{g}$ ). The morphology of particles from this study was inferred using lognormal fits of the size distributions given in figure S-13 of Cappa *et al.* 2012. The single particle BC mass was then calculated assuming BC density of  $1.8 \text{ g}/\text{cm}^3$  (2).

- 15 *Saliba, et al. 2016.*

Measured  $\text{MAC}_{BC}$  as a function of BC mixing state was taken from Figure 4 of Saliba *et al.* 2016 (3). The mixing state was then converted from organic to black carbon mass ratio (OA:BC) to  $R_{BC}$  using:

20  $R_{BC} = \text{OA}:\text{BC}.$  (S2)

The morphology of particles from this study was inferred using lognormal fits of the size distributions given in figure S9 of Saliba *et al.* 2019. The single particle BC mass was then calculated assuming BC density of  $1.8 \text{ g}/\text{cm}^3$  (2).

- 25 *Xie, et al. 2019.*

Measured  $E_{\text{abs}}$  as a function of  $R_{BC}$  was taken from Figure 1a of Xie *et al.* 2019 (4). enhancement was converted to  $\text{MAC}_{BC}$  using a reference  $\text{MAC}_{BC}$  value of  $6.55 \text{ m}^2/\text{g}$  at  $\lambda = 630 \text{ nm}$ , given that the authors state that the thermodenuder-derived  $E_{\text{abs}}$  was well correlated with  $E_{\text{abs}}$  calculated using reference  $\text{MAC}_{BC}$  (4).

- 30 *Cui, et al. 2016.*

Measured  $E_{\text{abs}}$  as a function of BC mixing state was taken from Figure 5c of Cui *et al.* 2016 (5). The mixing state was converted from organic to elemental carbon ratio (OC/EC) to  $R_{BC}$  using:

35  $R_{BC} = \text{OC}/\text{EC}.$  (S3)

Absorption enhancement was converted to  $\text{MAC}_{BC}$  using  $\text{MAC}_{BC}$  of pure BC =  $4.02 \text{ m}^2/\text{g}$  at  $\lambda = 678 \text{ nm}$ , given in figure 2 of Cui *et al.* 2016 (5).

*Denjean, et al. 2020.*

- 40 Measured  $E_{\text{abs}}$  as a function of BC mixing state was taken from Figure 2 of Denjean *et al.* 2020 (6). Absorption enhancement was converted to  $\text{MAC}_{BC}$  using  $\text{MAC}_{BC}$  of pure BC =  $7.7 \text{ m}^2/\text{g}$  at  $\lambda = 550 \text{ nm}$ . The morphology of particles from this study was inferred using lognormal fits of the size distributions given in figure 1 of Denjean *et al.* 2020. The average mass was then calculated assuming BC density of  $1.8 \text{ g}/\text{cm}^3$  (2).

*Zanatta, et al. 2018.*

- 45 Average  $\text{MAC}_{BC}$  and  $R_{BC}$  were found using reported values for average coating thickness, coating density, and  $\text{MAC}_{BC}$  in Zanatta *et al.* 2018 (7). The morphology of particles from this study was inferred using reported size distributions given in Table 2 of Zanatta *et al.* 2018. The single particle BC mass was then calculated assuming BC density of  $1.8 \text{ g}/\text{cm}^3$  (2).

*Liu, et al. 2015.*

- 50 Measured  $\text{MAC}_{BC}$  as a function of BC mixing state was taken from Figure S2 of Liu *et al.* 2015 (8). We utilize  $\text{MAC}_{BC}$  derived using standardized major axis at  $\lambda = 781 \text{ nm}$  in order to avoid potential influence of absorbing coatings on  $\text{MAC}_{BC}$ . The morphology of particles from this study was inferred using the limits of BC diameter given in Figure 1d of Liu *et al.* 2015. The single particle BC mass was then calculated assuming BC density of  $1.8 \text{ g}/\text{cm}^3$  (2).

- 55 *Cappa, et al. 2019.*

Measured  $\text{MAC}_{BC}$  as a function of BC mixing state was taken from Figure S4 and S6 of Cappa *et al.* 2019 (9). We analyze measurements of  $\text{MAC}_{BC}$  at  $\lambda = 532 \text{ nm}$  only.

*Shiraiwa, et al. 2010.*

- 60 Measured  $E_{\text{abs}}$  as a function of BC mixing state was taken from Figure 2 of Shiraiwa *et al.* 2010 (10). The mixing state was converted from the ratio of total particle diameter to black carbon diameter using BC density of  $1.8 \text{ g/cm}^3$  and coating density of  $1.2 \text{ g/cm}^3$  (2). The morphology of particles from this study was inferred using reported BC core diameter.

*Zhang, et al. 2018.*

- 65 Measured  $E_{\text{abs}}$  as a function of BC mixing state was taken from Figure S3 of Zhang *et al.* 2018 (11). The mixing state was converted from organic to elemental carbon mass ratio to  $R_{\text{BC}}$  using equation S3. Absorption enhancement was converted to  $\text{MAC}_{\text{BC}}$  using  $\text{MAC}_{\text{BC}}$  of pure BC =  $4.7 \text{ m}^2/\text{g}$  at  $\lambda = 880 \text{ nm}$ . The morphology of particles from this study was inferred using the reported range of BC core diameters (100-150 nm).

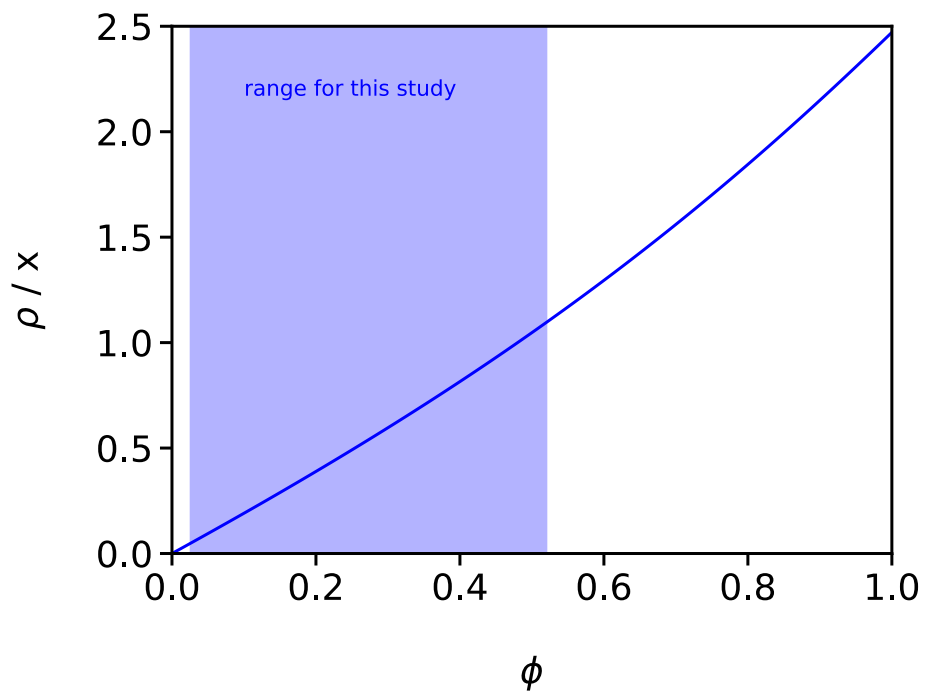

70

**Figure S1:** Size parameter normalized phase shift parameter of black carbon as a function of monomer packing fraction. The shaded area represents the range of monomer packing fraction for aggregates in this study.

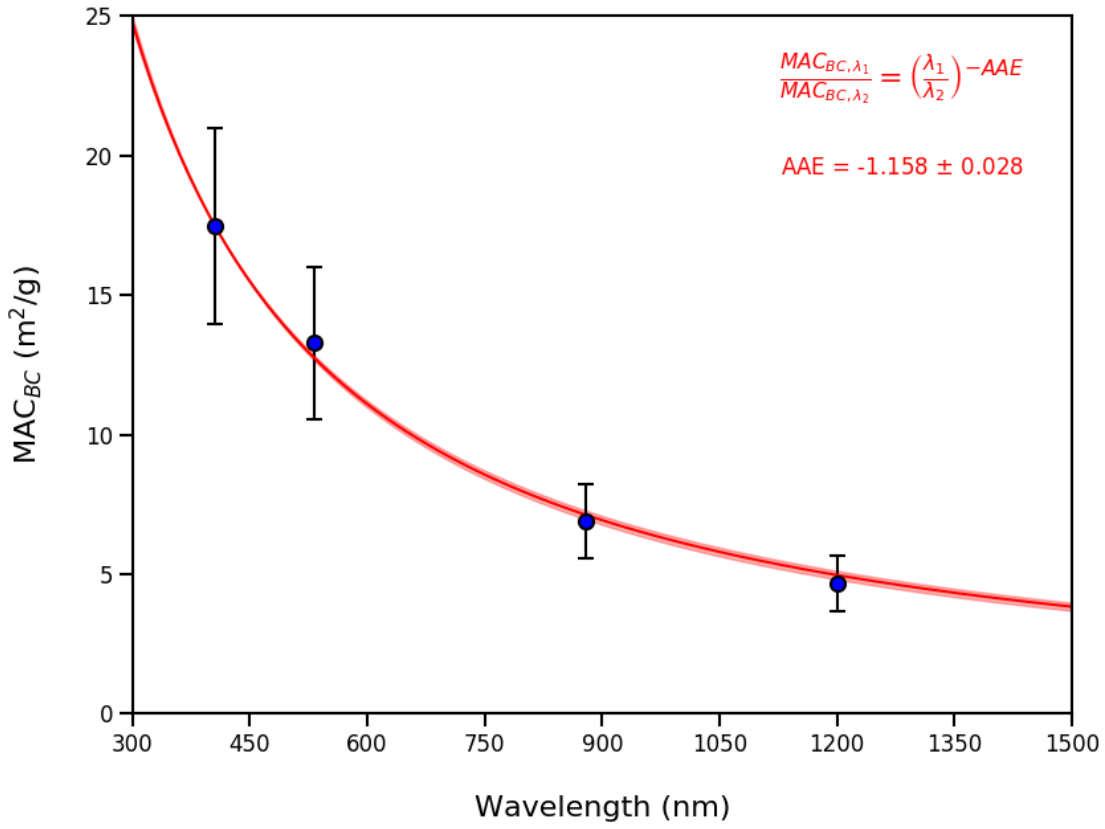

75

**Figure S2: Data used to calculate AAE for fractal BC aggregates with  $\rho_{BC} \leq 1$ , error bars show one standard deviation. Solid line shows fitted equation given in figure, error of AAE is reflective of 95% confidence interval.**

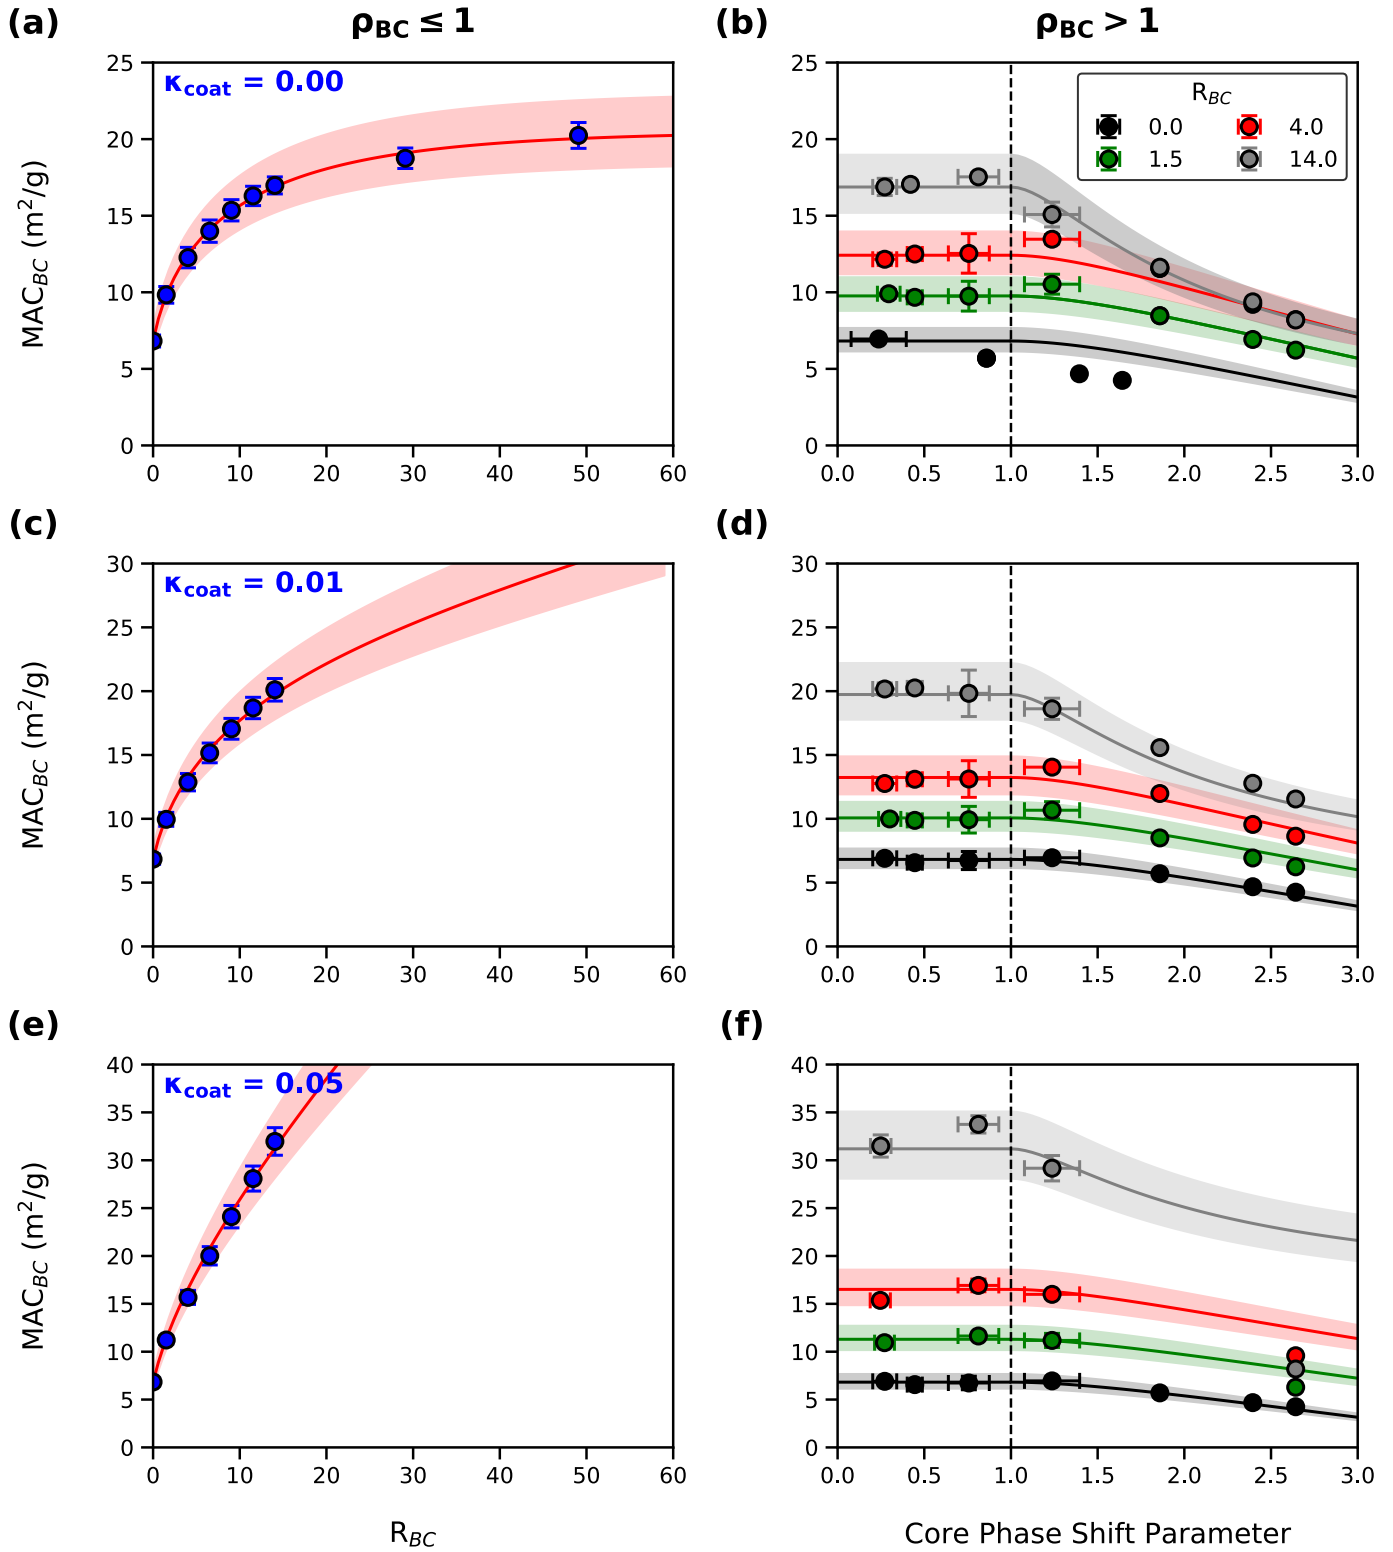

80

Figure S3: MAC<sub>BC</sub> as a function of R<sub>BC</sub> and  $\rho_{BC}$  with shaded areas representing the range of MAC<sub>BC</sub> assuming BC density of 1.6 g/cm<sup>3</sup> – 1.8 g/cm<sup>3</sup>.
